# Supplementary material for: Genome-wide identification, structural analysis and expression profiles of SRS gene family in quinoa
Source: Research Square preprint supplement (doi:10.21203/rs.3.rs-839802/v1), 2021-09-03
Supplement: Supplementary file 1 [file bac26f12635c3362c6e956e4.xlsx]

## Sheet: 1
S3 Table. Cis-acting elements in the promoter region of CqSRS genes
Gene Id	Gene name	Element	Function	Function category
AUR62016794-RA.v1.0	CqSRS08	3-AF1 binding site	light responsive element	Light responsive
AUR62018795-RA.v1.0	CqSRS09	3-AF1 binding site	light responsive element	Light responsive
AUR62034552-RA.v1.0	CqSRS10	3-AF1 binding site	light responsive element	Light responsive
AUR62000185-RA.v1.0	CqSRS01	AAAC-motif	light responsive element	Light responsive
AUR62006536-RA.v1.0	CqSRS02	AAAC-motif	light responsive element	Light responsive
AUR62007206-RA.v1.0	CqSRS03	ACE	cis-acting element involved in light responsiveness	Light responsive
AUR62007664-RA.v1.0	CqSRS05	ACE	cis-acting element involved in light responsiveness	Light responsive
AUR62010428-RA.v1.0	CqSRS06	ACE	cis-acting element involved in light responsiveness	Light responsive
AUR62018795-RA.v1.0	CqSRS09	ACE	cis-acting element involved in light responsiveness	Light responsive
AUR62006536-RA.v1.0	CqSRS02	AE-box	part of a module for light response	Light responsive
AUR62007664-RA.v1.0	CqSRS05	AE-box	part of a module for light response	Light responsive
AUR62016794-RA.v1.0	CqSRS08	AE-box	part of a module for light response	Light responsive
AUR62007664-RA.v1.0	CqSRS05	AT1-motif	part of a light responsive module	Light responsive
AUR62016794-RA.v1.0	CqSRS08	AT1-motif	part of a light responsive module	Light responsive
AUR62016794-RA.v1.0	CqSRS08	AT1-motif	part of a light responsive module	Light responsive
AUR62000185-RA.v1.0	CqSRS01	ATC-motif	part of a conserved DNA module involved in light responsiveness	Light responsive
AUR62007636-RA.v1.0	CqSRS04	ATC-motif	part of a conserved DNA module involved in light responsiveness	Light responsive
AUR62007206-RA.v1.0	CqSRS03	ATCT-motif	part of a conserved DNA module involved in light responsiveness	Light responsive
AUR62007636-RA.v1.0	CqSRS04	ATCT-motif	part of a conserved DNA module involved in light responsiveness	Light responsive
AUR62007664-RA.v1.0	CqSRS05	ATCT-motif	part of a conserved DNA module involved in light responsiveness	Light responsive
AUR62016794-RA.v1.0	CqSRS08	ATCT-motif	part of a conserved DNA module involved in light responsiveness	Light responsive
AUR62034552-RA.v1.0	CqSRS10	ATCT-motif	part of a conserved DNA module involved in light responsiveness	Light responsive
AUR62000185-RA.v1.0	CqSRS01	Box 4	part of a conserved DNA module involved in light responsiveness	Light responsive
AUR62000185-RA.v1.0	CqSRS01	Box 4	part of a conserved DNA module involved in light responsiveness	Light responsive
AUR62000185-RA.v1.0	CqSRS01	Box 4	part of a conserved DNA module involved in light responsiveness	Light responsive
AUR62000185-RA.v1.0	CqSRS01	Box 4	part of a conserved DNA module involved in light responsiveness	Light responsive
AUR62006536-RA.v1.0	CqSRS02	Box 4	part of a conserved DNA module involved in light responsiveness	Light responsive
AUR62006536-RA.v1.0	CqSRS02	Box 4	part of a conserved DNA module involved in light responsiveness	Light responsive
AUR62006536-RA.v1.0	CqSRS02	Box 4	part of a conserved DNA module involved in light responsiveness	Light responsive
AUR62007206-RA.v1.0	CqSRS03	Box 4	part of a conserved DNA module involved in light responsiveness	Light responsive
AUR62007636-RA.v1.0	CqSRS04	Box 4	part of a conserved DNA module involved in light responsiveness	Light responsive
AUR62007636-RA.v1.0	CqSRS04	Box 4	part of a conserved DNA module involved in light responsiveness	Light responsive
AUR62007636-RA.v1.0	CqSRS04	Box 4	part of a conserved DNA module involved in light responsiveness	Light responsive
AUR62007636-RA.v1.0	CqSRS04	Box 4	part of a conserved DNA module involved in light responsiveness	Light responsive
AUR62007664-RA.v1.0	CqSRS05	Box 4	part of a conserved DNA module involved in light responsiveness	Light responsive
AUR62007664-RA.v1.0	CqSRS05	Box 4	part of a conserved DNA module involved in light responsiveness	Light responsive
AUR62007664-RA.v1.0	CqSRS05	Box 4	part of a conserved DNA module involved in light responsiveness	Light responsive
AUR62010428-RA.v1.0	CqSRS06	Box 4	part of a conserved DNA module involved in light responsiveness	Light responsive
AUR62010428-RA.v1.0	CqSRS06	Box 4	part of a conserved DNA module involved in light responsiveness	Light responsive
AUR62014445-RA.v1.0	CqSRS07	Box 4	part of a conserved DNA module involved in light responsiveness	Light responsive
AUR62014445-RA.v1.0	CqSRS07	Box 4	part of a conserved DNA module involved in light responsiveness	Light responsive
AUR62014445-RA.v1.0	CqSRS07	Box 4	part of a conserved DNA module involved in light responsiveness	Light responsive
AUR62016794-RA.v1.0	CqSRS08	Box 4	part of a conserved DNA module involved in light responsiveness	Light responsive
AUR62018795-RA.v1.0	CqSRS09	Box 4	part of a conserved DNA module involved in light responsiveness	Light responsive
AUR62018795-RA.v1.0	CqSRS09	Box 4	part of a conserved DNA module involved in light responsiveness	Light responsive
AUR62018795-RA.v1.0	CqSRS09	Box 4	part of a conserved DNA module involved in light responsiveness	Light responsive
AUR62018795-RA.v1.0	CqSRS09	Box 4	part of a conserved DNA module involved in light responsiveness	Light responsive
AUR62018795-RA.v1.0	CqSRS09	Box 4	part of a conserved DNA module involved in light responsiveness	Light responsive
AUR62018795-RA.v1.0	CqSRS09	Box 4	part of a conserved DNA module involved in light responsiveness	Light responsive
AUR62018795-RA.v1.0	CqSRS09	Box 4	part of a conserved DNA module involved in light responsiveness	Light responsive
AUR62018795-RA.v1.0	CqSRS09	Box 4	part of a conserved DNA module involved in light responsiveness	Light responsive
AUR62018795-RA.v1.0	CqSRS09	Box 4	part of a conserved DNA module involved in light responsiveness	Light responsive
AUR62018795-RA.v1.0	CqSRS09	Box 4	part of a conserved DNA module involved in light responsiveness	Light responsive
AUR62034552-RA.v1.0	CqSRS10	Box 4	part of a conserved DNA module involved in light responsiveness	Light responsive
AUR62034552-RA.v1.0	CqSRS10	Box 4	part of a conserved DNA module involved in light responsiveness	Light responsive
AUR62034552-RA.v1.0	CqSRS10	Box 4	part of a conserved DNA module involved in light responsiveness	Light responsive
AUR62014445-RA.v1.0	CqSRS07	Box II	part of a light responsive element	Light responsive
AUR62000185-RA.v1.0	CqSRS01	chs-CMA1a	part of a light responsive element	Light responsive
AUR62007664-RA.v1.0	CqSRS05	chs-CMA1a	part of a light responsive element	Light responsive
AUR62016794-RA.v1.0	CqSRS08	chs-CMA2a	part of a light responsive element	Light responsive
AUR62000185-RA.v1.0	CqSRS01	GA-motif	part of a light responsive element	Light responsive
AUR62006536-RA.v1.0	CqSRS02	GA-motif	part of a light responsive element	Light responsive
AUR62018795-RA.v1.0	CqSRS09	GA-motif	part of a light responsive element	Light responsive
AUR62000185-RA.v1.0	CqSRS01	GATA-motif	part of a light responsive element	Light responsive
AUR62007206-RA.v1.0	CqSRS03	GATA-motif	part of a light responsive element	Light responsive
AUR62010428-RA.v1.0	CqSRS06	GATA-motif	part of a light responsive element	Light responsive
AUR62010428-RA.v1.0	CqSRS06	GATA-motif	part of a light responsive element	Light responsive
AUR62010428-RA.v1.0	CqSRS06	GATA-motif	part of a light responsive element	Light responsive
AUR62014445-RA.v1.0	CqSRS07	GATA-motif	part of a light responsive element	Light responsive
AUR62016794-RA.v1.0	CqSRS08	GATA-motif	part of a light responsive element	Light responsive
AUR62018795-RA.v1.0	CqSRS09	GATA-motif	part of a light responsive element	Light responsive
AUR62018795-RA.v1.0	CqSRS09	GATA-motif	part of a light responsive element	Light responsive
AUR62034552-RA.v1.0	CqSRS10	GATA-motif	part of a light responsive element	Light responsive
AUR62007636-RA.v1.0	CqSRS04	GATT-motif	part of a light responsive element	Light responsive
AUR62007664-RA.v1.0	CqSRS05	GATT-motif	part of a light responsive element	Light responsive
AUR62000185-RA.v1.0	CqSRS01	G-Box	cis-acting regulatory element involved in light responsiveness	Light responsive
AUR62000185-RA.v1.0	CqSRS01	G-Box	cis-acting regulatory element involved in light responsiveness	Light responsive
AUR62000185-RA.v1.0	CqSRS01	G-Box	cis-acting regulatory element involved in light responsiveness	Light responsive
AUR62000185-RA.v1.0	CqSRS01	G-Box	cis-acting regulatory element involved in light responsiveness	Light responsive
AUR62000185-RA.v1.0	CqSRS01	G-box	cis-acting regulatory element involved in light responsiveness	Light responsive
AUR62000185-RA.v1.0	CqSRS01	G-box	cis-acting regulatory element involved in light responsiveness	Light responsive
AUR62000185-RA.v1.0	CqSRS01	G-box	cis-acting regulatory element involved in light responsiveness	Light responsive
AUR62006536-RA.v1.0	CqSRS02	G-Box	cis-acting regulatory element involved in light responsiveness	Light responsive
AUR62006536-RA.v1.0	CqSRS02	G-Box	cis-acting regulatory element involved in light responsiveness	Light responsive
AUR62006536-RA.v1.0	CqSRS02	G-box	cis-acting regulatory element involved in light responsiveness	Light responsive
AUR62007206-RA.v1.0	CqSRS03	G-Box	cis-acting regulatory element involved in light responsiveness	Light responsive
AUR62007206-RA.v1.0	CqSRS03	G-Box	cis-acting regulatory element involved in light responsiveness	Light responsive
AUR62007206-RA.v1.0	CqSRS03	G-box	cis-acting regulatory element involved in light responsiveness	Light responsive
AUR62007206-RA.v1.0	CqSRS03	G-box	cis-acting regulatory element involved in light responsiveness	Light responsive
AUR62007206-RA.v1.0	CqSRS03	G-box	cis-acting regulatory element involved in light responsiveness	Light responsive
AUR62007206-RA.v1.0	CqSRS03	G-box	cis-acting regulatory element involved in light responsiveness	Light responsive
AUR62007206-RA.v1.0	CqSRS03	G-box	cis-acting regulatory element involved in light responsiveness	Light responsive
AUR62007206-RA.v1.0	CqSRS03	G-box	cis-acting regulatory element involved in light responsiveness	Light responsive
AUR62007206-RA.v1.0	CqSRS03	G-box	cis-acting regulatory element involved in light responsiveness	Light responsive
AUR62007636-RA.v1.0	CqSRS04	G-box	cis-acting regulatory element involved in light responsiveness	Light responsive
AUR62007636-RA.v1.0	CqSRS04	G-box	cis-acting regulatory element involved in light responsiveness	Light responsive
AUR62007636-RA.v1.0	CqSRS04	G-box	cis-acting regulatory element involved in light responsiveness	Light responsive
AUR62007636-RA.v1.0	CqSRS04	G-Box	cis-acting regulatory element involved in light responsiveness	Light responsive
AUR62007664-RA.v1.0	CqSRS05	G-Box	cis-acting regulatory element involved in light responsiveness	Light responsive
AUR62007664-RA.v1.0	CqSRS05	G-box	cis-acting regulatory element involved in light responsiveness	Light responsive
AUR62007664-RA.v1.0	CqSRS05	G-box	cis-acting regulatory element involved in light responsiveness	Light responsive
AUR62010428-RA.v1.0	CqSRS06	G-box	cis-acting regulatory element involved in light responsiveness	Light responsive
AUR62010428-RA.v1.0	CqSRS06	G-box	cis-acting regulatory element involved in light responsiveness	Light responsive
AUR62014445-RA.v1.0	CqSRS07	G-Box	cis-acting regulatory element involved in light responsiveness	Light responsive
AUR62014445-RA.v1.0	CqSRS07	G-Box	cis-acting regulatory element involved in light responsiveness	Light responsive
AUR62014445-RA.v1.0	CqSRS07	G-Box	cis-acting regulatory element involved in light responsiveness	Light responsive
AUR62014445-RA.v1.0	CqSRS07	G-box	cis-acting regulatory element involved in light responsiveness	Light responsive
AUR62014445-RA.v1.0	CqSRS07	G-box	cis-acting regulatory element involved in light responsiveness	Light responsive
AUR62014445-RA.v1.0	CqSRS07	G-box	cis-acting regulatory element involved in light responsiveness	Light responsive
AUR62014445-RA.v1.0	CqSRS07	G-box	cis-acting regulatory element involved in light responsiveness	Light responsive
AUR62014445-RA.v1.0	CqSRS07	G-box	cis-acting regulatory element involved in light responsiveness	Light responsive
AUR62014445-RA.v1.0	CqSRS07	G-box	cis-acting regulatory element involved in light responsiveness	Light responsive
AUR62014445-RA.v1.0	CqSRS07	G-box	cis-acting regulatory element involved in light responsiveness	Light responsive
AUR62016794-RA.v1.0	CqSRS08	G-box	cis-acting regulatory element involved in light responsiveness	Light responsive
AUR62018795-RA.v1.0	CqSRS09	G-box	cis-acting regulatory element involved in light responsiveness	Light responsive
AUR62034552-RA.v1.0	CqSRS10	G-box	cis-acting regulatory element involved in light responsiveness	Light responsive
AUR62034552-RA.v1.0	CqSRS10	G-box	cis-acting regulatory element involved in light responsiveness	Light responsive
AUR62034552-RA.v1.0	CqSRS10	G-box	cis-acting regulatory element involved in light responsiveness	Light responsive
AUR62034552-RA.v1.0	CqSRS10	G-box	cis-acting regulatory element involved in light responsiveness	Light responsive
AUR62034552-RA.v1.0	CqSRS10	G-box	cis-acting regulatory element involved in light responsiveness	Light responsive
AUR62034552-RA.v1.0	CqSRS10	G-box	cis-acting regulatory element involved in light responsiveness	Light responsive
AUR62034552-RA.v1.0	CqSRS10	G-Box	cis-acting regulatory element involved in light responsiveness	Light responsive
AUR62034552-RA.v1.0	CqSRS10	G-Box	cis-acting regulatory element involved in light responsiveness	Light responsive
AUR62007206-RA.v1.0	CqSRS03	GT1-motif	light responsive element	Light responsive
AUR62007206-RA.v1.0	CqSRS03	GT1-motif	light responsive element	Light responsive
AUR62007636-RA.v1.0	CqSRS04	GT1-motif	light responsive element	Light responsive
AUR62007636-RA.v1.0	CqSRS04	GT1-motif	light responsive element	Light responsive
AUR62007636-RA.v1.0	CqSRS04	GT1-motif	light responsive element	Light responsive
AUR62007636-RA.v1.0	CqSRS04	GT1-motif	light responsive element	Light responsive
AUR62007636-RA.v1.0	CqSRS04	GT1-motif	light responsive element	Light responsive
AUR62007636-RA.v1.0	CqSRS04	GT1-motif	light responsive element	Light responsive
AUR62007664-RA.v1.0	CqSRS05	GT1-motif	light responsive element	Light responsive
AUR62007664-RA.v1.0	CqSRS05	GT1-motif	light responsive element	Light responsive
AUR62007664-RA.v1.0	CqSRS05	GT1-motif	light responsive element	Light responsive
AUR62010428-RA.v1.0	CqSRS06	GT1-motif	light responsive element	Light responsive
AUR62010428-RA.v1.0	CqSRS06	GT1-motif	light responsive element	Light responsive
AUR62010428-RA.v1.0	CqSRS06	GT1-motif	light responsive element	Light responsive
AUR62014445-RA.v1.0	CqSRS07	GT1-motif	light responsive element	Light responsive
AUR62014445-RA.v1.0	CqSRS07	GT1-motif	light responsive element	Light responsive
AUR62014445-RA.v1.0	CqSRS07	GT1-motif	light responsive element	Light responsive
AUR62014445-RA.v1.0	CqSRS07	GT1-motif	light responsive element	Light responsive
AUR62016794-RA.v1.0	CqSRS08	GT1-motif	light responsive element	Light responsive
AUR62016794-RA.v1.0	CqSRS08	GT1-motif	light responsive element	Light responsive
AUR62016794-RA.v1.0	CqSRS08	GT1-motif	light responsive element	Light responsive
AUR62016794-RA.v1.0	CqSRS08	GT1-motif	light responsive element	Light responsive
AUR62018795-RA.v1.0	CqSRS09	GT1-motif	light responsive element	Light responsive
AUR62018795-RA.v1.0	CqSRS09	GT1-motif	light responsive element	Light responsive
AUR62018795-RA.v1.0	CqSRS09	GT1-motif	light responsive element	Light responsive
AUR62034552-RA.v1.0	CqSRS10	GT1-motif	light responsive element	Light responsive
AUR62034552-RA.v1.0	CqSRS10	GT1-motif	light responsive element	Light responsive
AUR62034552-RA.v1.0	CqSRS10	GT1-motif	light responsive element	Light responsive
AUR62034552-RA.v1.0	CqSRS10	GT1-motif	light responsive element	Light responsive
AUR62006536-RA.v1.0	CqSRS02	I-box	part of a light responsive element	Light responsive
AUR62006536-RA.v1.0	CqSRS02	I-box	part of a light responsive element	Light responsive
AUR62007206-RA.v1.0	CqSRS03	I-box	part of a light responsive element	Light responsive
AUR62007206-RA.v1.0	CqSRS03	I-box	part of a light responsive element	Light responsive
AUR62007206-RA.v1.0	CqSRS03	I-box	part of a light responsive element	Light responsive
AUR62007636-RA.v1.0	CqSRS04	I-box	part of a light responsive element	Light responsive
AUR62007636-RA.v1.0	CqSRS04	I-box	part of a light responsive element	Light responsive
AUR62007636-RA.v1.0	CqSRS04	I-box	part of a light responsive element	Light responsive
AUR62010428-RA.v1.0	CqSRS06	I-box	part of a light responsive element	Light responsive
AUR62010428-RA.v1.0	CqSRS06	I-box	part of a light responsive element	Light responsive
AUR62010428-RA.v1.0	CqSRS06	I-box	part of a light responsive element	Light responsive
AUR62010428-RA.v1.0	CqSRS06	I-box	part of a light responsive element	Light responsive
AUR62016794-RA.v1.0	CqSRS08	I-box	part of a light responsive element	Light responsive
AUR62010428-RA.v1.0	CqSRS06	L-box	part of a light responsive element	Light responsive
AUR62000185-RA.v1.0	CqSRS01	MRE	MYB binding site involved in light responsiveness	Light responsive
AUR62000185-RA.v1.0	CqSRS01	MRE	MYB binding site involved in light responsiveness	Light responsive
AUR62006536-RA.v1.0	CqSRS02	MRE	MYB binding site involved in light responsiveness	Light responsive
AUR62014445-RA.v1.0	CqSRS07	MRE	MYB binding site involved in light responsiveness	Light responsive
AUR62016794-RA.v1.0	CqSRS08	MRE	MYB binding site involved in light responsiveness	Light responsive
AUR62034552-RA.v1.0	CqSRS10	MRE	MYB binding site involved in light responsiveness	Light responsive
AUR62016794-RA.v1.0	CqSRS08	Sp1	light responsive element	Light responsive
AUR62007206-RA.v1.0	CqSRS03	TCCC-motif	part of a light responsive element	Light responsive
AUR62018795-RA.v1.0	CqSRS09	TCCC-motif	part of a light responsive element	Light responsive
AUR62000185-RA.v1.0	CqSRS01	TCT-motif	part of a light responsive element	Light responsive
AUR62000185-RA.v1.0	CqSRS01	TCT-motif	part of a light responsive element	Light responsive
AUR62006536-RA.v1.0	CqSRS02	TCT-motif	part of a light responsive element	Light responsive
AUR62006536-RA.v1.0	CqSRS02	TCT-motif	part of a light responsive element	Light responsive
AUR62007206-RA.v1.0	CqSRS03	TCT-motif	part of a light responsive element	Light responsive
AUR62007636-RA.v1.0	CqSRS04	TCT-motif	part of a light responsive element	Light responsive
AUR62007636-RA.v1.0	CqSRS04	TCT-motif	part of a light responsive element	Light responsive
AUR62007636-RA.v1.0	CqSRS04	TCT-motif	part of a light responsive element	Light responsive
AUR62007664-RA.v1.0	CqSRS05	TCT-motif	part of a light responsive element	Light responsive
AUR62007664-RA.v1.0	CqSRS05	TCT-motif	part of a light responsive element	Light responsive
AUR62007664-RA.v1.0	CqSRS05	TCT-motif	part of a light responsive element	Light responsive
AUR62007664-RA.v1.0	CqSRS05	TCT-motif	part of a light responsive element	Light responsive
AUR62010428-RA.v1.0	CqSRS06	TCT-motif	part of a light responsive element	Light responsive
AUR62010428-RA.v1.0	CqSRS06	TCT-motif	part of a light responsive element	Light responsive
AUR62010428-RA.v1.0	CqSRS06	TCT-motif	part of a light responsive element	Light responsive
AUR62014445-RA.v1.0	CqSRS07	TCT-motif	part of a light responsive element	Light responsive
AUR62014445-RA.v1.0	CqSRS07	TCT-motif	part of a light responsive element	Light responsive
AUR62014445-RA.v1.0	CqSRS07	TCT-motif	part of a light responsive element	Light responsive
AUR62016794-RA.v1.0	CqSRS08	TCT-motif	part of a light responsive element	Light responsive
AUR62018795-RA.v1.0	CqSRS09	TCT-motif	part of a light responsive element	Light responsive
AUR62034552-RA.v1.0	CqSRS10	TCT-motif	part of a light responsive element	Light responsive
AUR62034552-RA.v1.0	CqSRS10	TCT-motif	part of a light responsive element	Light responsive
AUR62034552-RA.v1.0	CqSRS10	TCT-motif	part of a light responsive element	Light responsive
AUR62034552-RA.v1.0	CqSRS10	TCT-motif	part of a light responsive element	Light responsive
AUR62034552-RA.v1.0	CqSRS10	TCT-motif	part of a light responsive element	Light responsive
AUR62000185-RA.v1.0	CqSRS01	TC-rich repeats	cis-acting element involved in defense and stress responsiveness	Stress responsiveness
AUR62007206-RA.v1.0	CqSRS03	TC-rich repeats	cis-acting element involved in defense and stress responsiveness	Stress responsiveness
AUR62007206-RA.v1.0	CqSRS03	TC-rich repeats	cis-acting element involved in defense and stress responsiveness	Stress responsiveness
AUR62007206-RA.v1.0	CqSRS03	TC-rich repeats	cis-acting element involved in defense and stress responsiveness	Stress responsiveness
AUR62007636-RA.v1.0	CqSRS04	TC-rich repeats	cis-acting element involved in defense and stress responsiveness	Stress responsiveness
AUR62007636-RA.v1.0	CqSRS04	TC-rich repeats	cis-acting element involved in defense and stress responsiveness	Stress responsiveness
AUR62007664-RA.v1.0	CqSRS05	TC-rich repeats	cis-acting element involved in defense and stress responsiveness	Stress responsiveness
AUR62014445-RA.v1.0	CqSRS07	TC-rich repeats	cis-acting element involved in defense and stress responsiveness	Stress responsiveness
AUR62016794-RA.v1.0	CqSRS08	TC-rich repeats	cis-acting element involved in defense and stress responsiveness	Stress responsiveness
AUR62018795-RA.v1.0	CqSRS09	TC-rich repeats	cis-acting element involved in defense and stress responsiveness	Stress responsiveness
AUR62018795-RA.v1.0	CqSRS09	TC-rich repeats	cis-acting element involved in defense and stress responsiveness	Stress responsiveness
AUR62034552-RA.v1.0	CqSRS10	TC-rich repeats	cis-acting element involved in defense and stress responsiveness	Stress responsiveness
AUR62034552-RA.v1.0	CqSRS10	TC-rich repeats	cis-acting element involved in defense and stress responsiveness	Stress responsiveness
AUR62014445-RA.v1.0	CqSRS07	LTR	cis-acting element involved in low-temperature responsiveness	Stress responsiveness
AUR62014445-RA.v1.0	CqSRS07	LTR	cis-acting element involved in low-temperature responsiveness	Stress responsiveness
AUR62016794-RA.v1.0	CqSRS08	LTR	cis-acting element involved in low-temperature responsiveness	Stress responsiveness
AUR62018795-RA.v1.0	CqSRS09	LTR	cis-acting element involved in low-temperature responsiveness	Stress responsiveness
AUR62018795-RA.v1.0	CqSRS09	LTR	cis-acting element involved in low-temperature responsiveness	Stress responsiveness
AUR62018795-RA.v1.0	CqSRS09	LTR	cis-acting element involved in low-temperature responsiveness	Stress responsiveness
AUR62034552-RA.v1.0	CqSRS10	LTR	cis-acting element involved in low-temperature responsiveness	Stress responsiveness
AUR62034552-RA.v1.0	CqSRS10	LTR	cis-acting element involved in low-temperature responsiveness	Stress responsiveness
AUR62000185-RA.v1.0	CqSRS01	MBS	MYB binding site involved in drought-inducibility	Stress responsiveness
AUR62007206-RA.v1.0	CqSRS03	MBS	MYB binding site involved in drought-inducibility	Stress responsiveness
AUR62014445-RA.v1.0	CqSRS07	MBS	MYB binding site involved in drought-inducibility	Stress responsiveness
AUR62018795-RA.v1.0	CqSRS09	MBS	MYB binding site involved in drought-inducibility	Stress responsiveness
AUR62034552-RA.v1.0	CqSRS10	MBS	MYB binding site involved in drought-inducibility	Stress responsiveness
AUR62000185-RA.v1.0	CqSRS01	ARE	cis-acting regulatory element essential for the anaerobic induction	Tissue-specific expression
AUR62000185-RA.v1.0	CqSRS01	ARE	cis-acting regulatory element essential for the anaerobic induction	Tissue-specific expression
AUR62000185-RA.v1.0	CqSRS01	ARE	cis-acting regulatory element essential for the anaerobic induction	Tissue-specific expression
AUR62000185-RA.v1.0	CqSRS01	ARE	cis-acting regulatory element essential for the anaerobic induction	Tissue-specific expression
AUR62006536-RA.v1.0	CqSRS02	ARE	cis-acting regulatory element essential for the anaerobic induction	Tissue-specific expression
AUR62006536-RA.v1.0	CqSRS02	ARE	cis-acting regulatory element essential for the anaerobic induction	Tissue-specific expression
AUR62006536-RA.v1.0	CqSRS02	ARE	cis-acting regulatory element essential for the anaerobic induction	Tissue-specific expression
AUR62006536-RA.v1.0	CqSRS02	ARE	cis-acting regulatory element essential for the anaerobic induction	Tissue-specific expression
AUR62006536-RA.v1.0	CqSRS02	ARE	cis-acting regulatory element essential for the anaerobic induction	Tissue-specific expression
AUR62006536-RA.v1.0	CqSRS02	ARE	cis-acting regulatory element essential for the anaerobic induction	Tissue-specific expression
AUR62007206-RA.v1.0	CqSRS03	ARE	cis-acting regulatory element essential for the anaerobic induction	Tissue-specific expression
AUR62007206-RA.v1.0	CqSRS03	ARE	cis-acting regulatory element essential for the anaerobic induction	Tissue-specific expression
AUR62007206-RA.v1.0	CqSRS03	ARE	cis-acting regulatory element essential for the anaerobic induction	Tissue-specific expression
AUR62007206-RA.v1.0	CqSRS03	ARE	cis-acting regulatory element essential for the anaerobic induction	Tissue-specific expression
AUR62007206-RA.v1.0	CqSRS03	ARE	cis-acting regulatory element essential for the anaerobic induction	Tissue-specific expression
AUR62007636-RA.v1.0	CqSRS04	ARE	cis-acting regulatory element essential for the anaerobic induction	Tissue-specific expression
AUR62007664-RA.v1.0	CqSRS05	ARE	cis-acting regulatory element essential for the anaerobic induction	Tissue-specific expression
AUR62007664-RA.v1.0	CqSRS05	ARE	cis-acting regulatory element essential for the anaerobic induction	Tissue-specific expression
AUR62007664-RA.v1.0	CqSRS05	ARE	cis-acting regulatory element essential for the anaerobic induction	Tissue-specific expression
AUR62010428-RA.v1.0	CqSRS06	ARE	cis-acting regulatory element essential for the anaerobic induction	Tissue-specific expression
AUR62014445-RA.v1.0	CqSRS07	ARE	cis-acting regulatory element essential for the anaerobic induction	Tissue-specific expression
AUR62014445-RA.v1.0	CqSRS07	ARE	cis-acting regulatory element essential for the anaerobic induction	Tissue-specific expression
AUR62014445-RA.v1.0	CqSRS07	ARE	cis-acting regulatory element essential for the anaerobic induction	Tissue-specific expression
AUR62014445-RA.v1.0	CqSRS07	ARE	cis-acting regulatory element essential for the anaerobic induction	Tissue-specific expression
AUR62016794-RA.v1.0	CqSRS08	ARE	cis-acting regulatory element essential for the anaerobic induction	Tissue-specific expression
AUR62016794-RA.v1.0	CqSRS08	ARE	cis-acting regulatory element essential for the anaerobic induction	Tissue-specific expression
AUR62016794-RA.v1.0	CqSRS08	ARE	cis-acting regulatory element essential for the anaerobic induction	Tissue-specific expression
AUR62018795-RA.v1.0	CqSRS09	ARE	cis-acting regulatory element essential for the anaerobic induction	Tissue-specific expression
AUR62018795-RA.v1.0	CqSRS09	ARE	cis-acting regulatory element essential for the anaerobic induction	Tissue-specific expression
AUR62018795-RA.v1.0	CqSRS09	ARE	cis-acting regulatory element essential for the anaerobic induction	Tissue-specific expression
AUR62034552-RA.v1.0	CqSRS10	ARE	cis-acting regulatory element essential for the anaerobic induction	Tissue-specific expression
AUR62034552-RA.v1.0	CqSRS10	ARE	cis-acting regulatory element essential for the anaerobic induction	Tissue-specific expression
AUR62034552-RA.v1.0	CqSRS10	ARE	cis-acting regulatory element essential for the anaerobic induction	Tissue-specific expression
AUR62007206-RA.v1.0	CqSRS03	O2-site	cis-acting regulatory element involved in zein metabolism regulation	Tissue-specific expression
AUR62010428-RA.v1.0	CqSRS06	O2-site	cis-acting regulatory element involved in zein metabolism regulation	Tissue-specific expression
AUR62010428-RA.v1.0	CqSRS06	O2-site	cis-acting regulatory element involved in zein metabolism regulation	Tissue-specific expression
AUR62016794-RA.v1.0	CqSRS08	O2-site	cis-acting regulatory element involved in zein metabolism regulation	Tissue-specific expression
AUR62018795-RA.v1.0	CqSRS09	O2-site	cis-acting regulatory element involved in zein metabolism regulation	Tissue-specific expression
AUR62018795-RA.v1.0	CqSRS09	O2-site	cis-acting regulatory element involved in zein metabolism regulation	Tissue-specific expression
AUR62034552-RA.v1.0	CqSRS10	O2-site	cis-acting regulatory element involved in zein metabolism regulation	Tissue-specific expression
AUR62016794-RA.v1.0	CqSRS08	CAT-box	cis-acting regulatory element related to meristem expression	Tissue-specific expression
AUR62034552-RA.v1.0	CqSRS10	CAT-box	cis-acting regulatory element related to meristem expression	Tissue-specific expression
AUR62007636-RA.v1.0	CqSRS04	GCN4_motif	cis-regulatory element involved in endosperm expression	Tissue-specific expression
AUR62000185-RA.v1.0	CqSRS01	AACA_motif	involved in endosperm-specific negative expression	Tissue-specific expression
AUR62006536-RA.v1.0	CqSRS02	AACA_motif	involved in endosperm-specific negative expression	Tissue-specific expression
AUR62000185-RA.v1.0	CqSRS01	GC-motif	enhancer-like element involved in anoxic specific inducibility	Tissue-specific expression
AUR62006536-RA.v1.0	CqSRS02	GC-motif	enhancer-like element involved in anoxic specific inducibility	Tissue-specific expression
AUR62007206-RA.v1.0	CqSRS03	GC-motif	enhancer-like element involved in anoxic specific inducibility	Tissue-specific expression
AUR62014445-RA.v1.0	CqSRS07	GC-motif	enhancer-like element involved in anoxic specific inducibility	Tissue-specific expression
AUR62034552-RA.v1.0	CqSRS10	GC-motif	enhancer-like element involved in anoxic specific inducibility	Tissue-specific expression
AUR62000185-RA.v1.0	CqSRS01	MBSI	MYB binding site involved in flavonoid biosynthetic genes regulation	Tissue-specific expression
AUR62014445-RA.v1.0	CqSRS07	MSA-like	cis-acting element involved in cell cycle regulation	Tissue-specific expression
AUR62034552-RA.v1.0	CqSRS10	MSA-like	cis-acting element involved in cell cycle regulation	Tissue-specific expression
AUR62000185-RA.v1.0	CqSRS01	ABRE	cis-acting element involved in the abscisic acid responsiveness	Phytohormone responsiveness
AUR62000185-RA.v1.0	CqSRS01	ABRE	cis-acting element involved in the abscisic acid responsiveness	Phytohormone responsiveness
AUR62000185-RA.v1.0	CqSRS01	ABRE	cis-acting element involved in the abscisic acid responsiveness	Phytohormone responsiveness
AUR62000185-RA.v1.0	CqSRS01	ABRE	cis-acting element involved in the abscisic acid responsiveness	Phytohormone responsiveness
AUR62000185-RA.v1.0	CqSRS01	ABRE	cis-acting element involved in the abscisic acid responsiveness	Phytohormone responsiveness
AUR62000185-RA.v1.0	CqSRS01	ABRE	cis-acting element involved in the abscisic acid responsiveness	Phytohormone responsiveness
AUR62000185-RA.v1.0	CqSRS01	ABRE	cis-acting element involved in the abscisic acid responsiveness	Phytohormone responsiveness
AUR62006536-RA.v1.0	CqSRS02	ABRE	cis-acting element involved in the abscisic acid responsiveness	Phytohormone responsiveness
AUR62006536-RA.v1.0	CqSRS02	ABRE	cis-acting element involved in the abscisic acid responsiveness	Phytohormone responsiveness
AUR62006536-RA.v1.0	CqSRS02	ABRE	cis-acting element involved in the abscisic acid responsiveness	Phytohormone responsiveness
AUR62007206-RA.v1.0	CqSRS03	ABRE	cis-acting element involved in the abscisic acid responsiveness	Phytohormone responsiveness
AUR62007206-RA.v1.0	CqSRS03	ABRE	cis-acting element involved in the abscisic acid responsiveness	Phytohormone responsiveness
AUR62007206-RA.v1.0	CqSRS03	ABRE	cis-acting element involved in the abscisic acid responsiveness	Phytohormone responsiveness
AUR62007206-RA.v1.0	CqSRS03	ABRE	cis-acting element involved in the abscisic acid responsiveness	Phytohormone responsiveness
AUR62007206-RA.v1.0	CqSRS03	ABRE	cis-acting element involved in the abscisic acid responsiveness	Phytohormone responsiveness
AUR62007636-RA.v1.0	CqSRS04	ABRE	cis-acting element involved in the abscisic acid responsiveness	Phytohormone responsiveness
AUR62007636-RA.v1.0	CqSRS04	ABRE	cis-acting element involved in the abscisic acid responsiveness	Phytohormone responsiveness
AUR62007636-RA.v1.0	CqSRS04	ABRE	cis-acting element involved in the abscisic acid responsiveness	Phytohormone responsiveness
AUR62007636-RA.v1.0	CqSRS04	ABRE	cis-acting element involved in the abscisic acid responsiveness	Phytohormone responsiveness
AUR62007664-RA.v1.0	CqSRS05	ABRE	cis-acting element involved in the abscisic acid responsiveness	Phytohormone responsiveness
AUR62007664-RA.v1.0	CqSRS05	ABRE	cis-acting element involved in the abscisic acid responsiveness	Phytohormone responsiveness
AUR62007664-RA.v1.0	CqSRS05	ABRE	cis-acting element involved in the abscisic acid responsiveness	Phytohormone responsiveness
AUR62010428-RA.v1.0	CqSRS06	ABRE	cis-acting element involved in the abscisic acid responsiveness	Phytohormone responsiveness
AUR62014445-RA.v1.0	CqSRS07	ABRE	cis-acting element involved in the abscisic acid responsiveness	Phytohormone responsiveness
AUR62014445-RA.v1.0	CqSRS07	ABRE	cis-acting element involved in the abscisic acid responsiveness	Phytohormone responsiveness
AUR62014445-RA.v1.0	CqSRS07	ABRE	cis-acting element involved in the abscisic acid responsiveness	Phytohormone responsiveness
AUR62014445-RA.v1.0	CqSRS07	ABRE	cis-acting element involved in the abscisic acid responsiveness	Phytohormone responsiveness
AUR62014445-RA.v1.0	CqSRS07	ABRE	cis-acting element involved in the abscisic acid responsiveness	Phytohormone responsiveness
AUR62014445-RA.v1.0	CqSRS07	ABRE	cis-acting element involved in the abscisic acid responsiveness	Phytohormone responsiveness
AUR62014445-RA.v1.0	CqSRS07	ABRE	cis-acting element involved in the abscisic acid responsiveness	Phytohormone responsiveness
AUR62016794-RA.v1.0	CqSRS08	ABRE	cis-acting element involved in the abscisic acid responsiveness	Phytohormone responsiveness
AUR62018795-RA.v1.0	CqSRS09	ABRE	cis-acting element involved in the abscisic acid responsiveness	Phytohormone responsiveness
AUR62034552-RA.v1.0	CqSRS10	ABRE	cis-acting element involved in the abscisic acid responsiveness	Phytohormone responsiveness
AUR62034552-RA.v1.0	CqSRS10	ABRE	cis-acting element involved in the abscisic acid responsiveness	Phytohormone responsiveness
AUR62034552-RA.v1.0	CqSRS10	ABRE	cis-acting element involved in the abscisic acid responsiveness	Phytohormone responsiveness
AUR62034552-RA.v1.0	CqSRS10	ABRE	cis-acting element involved in the abscisic acid responsiveness	Phytohormone responsiveness
AUR62034552-RA.v1.0	CqSRS10	ABRE	cis-acting element involved in the abscisic acid responsiveness	Phytohormone responsiveness
AUR62034552-RA.v1.0	CqSRS10	ABRE	cis-acting element involved in the abscisic acid responsiveness	Phytohormone responsiveness
AUR62034552-RA.v1.0	CqSRS10	ABRE	cis-acting element involved in the abscisic acid responsiveness	Phytohormone responsiveness
AUR62034552-RA.v1.0	CqSRS10	ABRE	cis-acting element involved in the abscisic acid responsiveness	Phytohormone responsiveness
AUR62007636-RA.v1.0	CqSRS04	AuxRE	part of an auxin-responsive element	Phytohormone responsiveness
AUR62007664-RA.v1.0	CqSRS05	AuxRE	part of an auxin-responsive element	Phytohormone responsiveness
AUR62016794-RA.v1.0	CqSRS08	AuxRE	part of an auxin-responsive element	Phytohormone responsiveness
AUR62007636-RA.v1.0	CqSRS04	AuxRR-core	cis-acting regulatory element involved in auxin responsiveness	Phytohormone responsiveness
AUR62000185-RA.v1.0	CqSRS01	CGTCA-motif	cis-acting regulatory element involved in the MeJA-responsiveness	Phytohormone responsiveness
AUR62000185-RA.v1.0	CqSRS01	CGTCA-motif	cis-acting regulatory element involved in the MeJA-responsiveness	Phytohormone responsiveness
AUR62006536-RA.v1.0	CqSRS02	CGTCA-motif	cis-acting regulatory element involved in the MeJA-responsiveness	Phytohormone responsiveness
AUR62006536-RA.v1.0	CqSRS02	CGTCA-motif	cis-acting regulatory element involved in the MeJA-responsiveness	Phytohormone responsiveness
AUR62007206-RA.v1.0	CqSRS03	CGTCA-motif	cis-acting regulatory element involved in the MeJA-responsiveness	Phytohormone responsiveness
AUR62007206-RA.v1.0	CqSRS03	CGTCA-motif	cis-acting regulatory element involved in the MeJA-responsiveness	Phytohormone responsiveness
AUR62007636-RA.v1.0	CqSRS04	CGTCA-motif	cis-acting regulatory element involved in the MeJA-responsiveness	Phytohormone responsiveness
AUR62007636-RA.v1.0	CqSRS04	CGTCA-motif	cis-acting regulatory element involved in the MeJA-responsiveness	Phytohormone responsiveness
AUR62007636-RA.v1.0	CqSRS04	CGTCA-motif	cis-acting regulatory element involved in the MeJA-responsiveness	Phytohormone responsiveness
AUR62007664-RA.v1.0	CqSRS05	CGTCA-motif	cis-acting regulatory element involved in the MeJA-responsiveness	Phytohormone responsiveness
AUR62007664-RA.v1.0	CqSRS05	CGTCA-motif	cis-acting regulatory element involved in the MeJA-responsiveness	Phytohormone responsiveness
AUR62010428-RA.v1.0	CqSRS06	CGTCA-motif	cis-acting regulatory element involved in the MeJA-responsiveness	Phytohormone responsiveness
AUR62010428-RA.v1.0	CqSRS06	CGTCA-motif	cis-acting regulatory element involved in the MeJA-responsiveness	Phytohormone responsiveness
AUR62014445-RA.v1.0	CqSRS07	CGTCA-motif	cis-acting regulatory element involved in the MeJA-responsiveness	Phytohormone responsiveness
AUR62016794-RA.v1.0	CqSRS08	CGTCA-motif	cis-acting regulatory element involved in the MeJA-responsiveness	Phytohormone responsiveness
AUR62018795-RA.v1.0	CqSRS09	CGTCA-motif	cis-acting regulatory element involved in the MeJA-responsiveness	Phytohormone responsiveness
AUR62018795-RA.v1.0	CqSRS09	CGTCA-motif	cis-acting regulatory element involved in the MeJA-responsiveness	Phytohormone responsiveness
AUR62018795-RA.v1.0	CqSRS09	CGTCA-motif	cis-acting regulatory element involved in the MeJA-responsiveness	Phytohormone responsiveness
AUR62018795-RA.v1.0	CqSRS09	CGTCA-motif	cis-acting regulatory element involved in the MeJA-responsiveness	Phytohormone responsiveness
AUR62018795-RA.v1.0	CqSRS09	CGTCA-motif	cis-acting regulatory element involved in the MeJA-responsiveness	Phytohormone responsiveness
AUR62018795-RA.v1.0	CqSRS09	CGTCA-motif	cis-acting regulatory element involved in the MeJA-responsiveness	Phytohormone responsiveness
AUR62034552-RA.v1.0	CqSRS10	CGTCA-motif	cis-acting regulatory element involved in the MeJA-responsiveness	Phytohormone responsiveness
AUR62007664-RA.v1.0	CqSRS05	GARE-motif	gibberellin-responsive element	Phytohormone responsiveness
AUR62014445-RA.v1.0	CqSRS07	GARE-motif	gibberellin-responsive element	Phytohormone responsiveness
AUR62016794-RA.v1.0	CqSRS08	GARE-motif	gibberellin-responsive element	Phytohormone responsiveness
AUR62034552-RA.v1.0	CqSRS10	GARE-motif	gibberellin-responsive element	Phytohormone responsiveness
AUR62034552-RA.v1.0	CqSRS10	GARE-motif	gibberellin-responsive element	Phytohormone responsiveness
AUR62006536-RA.v1.0	CqSRS02	P-box	gibberellin-responsive element	Phytohormone responsiveness
AUR62006536-RA.v1.0	CqSRS02	P-box	gibberellin-responsive element	Phytohormone responsiveness
AUR62010428-RA.v1.0	CqSRS06	P-box	gibberellin-responsive element	Phytohormone responsiveness
AUR62014445-RA.v1.0	CqSRS07	P-box	gibberellin-responsive element	Phytohormone responsiveness
AUR62034552-RA.v1.0	CqSRS10	P-box	gibberellin-responsive element	Phytohormone responsiveness
AUR62010428-RA.v1.0	CqSRS06	TATC-box	cis-acting element involved in gibberellin-responsiveness	Phytohormone responsiveness
AUR62010428-RA.v1.0	CqSRS06	TATC-box	cis-acting element involved in gibberellin-responsiveness	Phytohormone responsiveness
AUR62018795-RA.v1.0	CqSRS09	TATC-box	cis-acting element involved in gibberellin-responsiveness	Phytohormone responsiveness
AUR62000185-RA.v1.0	CqSRS01	TCA-element	cis-acting element involved in salicylic acid responsiveness	Phytohormone responsiveness
AUR62006536-RA.v1.0	CqSRS02	TCA-element	cis-acting element involved in salicylic acid responsiveness	Phytohormone responsiveness
AUR62006536-RA.v1.0	CqSRS02	TCA-element	cis-acting element involved in salicylic acid responsiveness	Phytohormone responsiveness
AUR62006536-RA.v1.0	CqSRS02	TCA-element	cis-acting element involved in salicylic acid responsiveness	Phytohormone responsiveness
AUR62007636-RA.v1.0	CqSRS04	TCA-element	cis-acting element involved in salicylic acid responsiveness	Phytohormone responsiveness
AUR62007636-RA.v1.0	CqSRS04	TCA-element	cis-acting element involved in salicylic acid responsiveness	Phytohormone responsiveness
AUR62007636-RA.v1.0	CqSRS04	TCA-element	cis-acting element involved in salicylic acid responsiveness	Phytohormone responsiveness
AUR62007636-RA.v1.0	CqSRS04	TCA-element	cis-acting element involved in salicylic acid responsiveness	Phytohormone responsiveness
AUR62007636-RA.v1.0	CqSRS04	TCA-element	cis-acting element involved in salicylic acid responsiveness	Phytohormone responsiveness
AUR62007664-RA.v1.0	CqSRS05	TCA-element	cis-acting element involved in salicylic acid responsiveness	Phytohormone responsiveness
AUR62007664-RA.v1.0	CqSRS05	TCA-element	cis-acting element involved in salicylic acid responsiveness	Phytohormone responsiveness
AUR62007664-RA.v1.0	CqSRS05	TCA-element	cis-acting element involved in salicylic acid responsiveness	Phytohormone responsiveness
AUR62014445-RA.v1.0	CqSRS07	TCA-element	cis-acting element involved in salicylic acid responsiveness	Phytohormone responsiveness
AUR62016794-RA.v1.0	CqSRS08	TCA-element	cis-acting element involved in salicylic acid responsiveness	Phytohormone responsiveness
AUR62034552-RA.v1.0	CqSRS10	TCA-element	cis-acting element involved in salicylic acid responsiveness	Phytohormone responsiveness
AUR62018795-RA.v1.0	CqSRS09	TGA-box	part of an auxin-responsive element	Phytohormone responsiveness
AUR62000185-RA.v1.0	CqSRS01	TGACG-motif	cis-acting regulatory element involved in the MeJA-responsiveness	Phytohormone responsiveness
AUR62000185-RA.v1.0	CqSRS01	TGACG-motif	cis-acting regulatory element involved in the MeJA-responsiveness	Phytohormone responsiveness
AUR62006536-RA.v1.0	CqSRS02	TGACG-motif	cis-acting regulatory element involved in the MeJA-responsiveness	Phytohormone responsiveness
AUR62006536-RA.v1.0	CqSRS02	TGACG-motif	cis-acting regulatory element involved in the MeJA-responsiveness	Phytohormone responsiveness
AUR62007206-RA.v1.0	CqSRS03	TGACG-motif	cis-acting regulatory element involved in the MeJA-responsiveness	Phytohormone responsiveness
AUR62007206-RA.v1.0	CqSRS03	TGACG-motif	cis-acting regulatory element involved in the MeJA-responsiveness	Phytohormone responsiveness
AUR62007636-RA.v1.0	CqSRS04	TGACG-motif	cis-acting regulatory element involved in the MeJA-responsiveness	Phytohormone responsiveness
AUR62007636-RA.v1.0	CqSRS04	TGACG-motif	cis-acting regulatory element involved in the MeJA-responsiveness	Phytohormone responsiveness
AUR62007636-RA.v1.0	CqSRS04	TGACG-motif	cis-acting regulatory element involved in the MeJA-responsiveness	Phytohormone responsiveness
AUR62007664-RA.v1.0	CqSRS05	TGACG-motif	cis-acting regulatory element involved in the MeJA-responsiveness	Phytohormone responsiveness
AUR62007664-RA.v1.0	CqSRS05	TGACG-motif	cis-acting regulatory element involved in the MeJA-responsiveness	Phytohormone responsiveness
AUR62010428-RA.v1.0	CqSRS06	TGACG-motif	cis-acting regulatory element involved in the MeJA-responsiveness	Phytohormone responsiveness
AUR62010428-RA.v1.0	CqSRS06	TGACG-motif	cis-acting regulatory element involved in the MeJA-responsiveness	Phytohormone responsiveness
AUR62014445-RA.v1.0	CqSRS07	TGACG-motif	cis-acting regulatory element involved in the MeJA-responsiveness	Phytohormone responsiveness
AUR62016794-RA.v1.0	CqSRS08	TGACG-motif	cis-acting regulatory element involved in the MeJA-responsiveness	Phytohormone responsiveness
AUR62018795-RA.v1.0	CqSRS09	TGACG-motif	cis-acting regulatory element involved in the MeJA-responsiveness	Phytohormone responsiveness
AUR62018795-RA.v1.0	CqSRS09	TGACG-motif	cis-acting regulatory element involved in the MeJA-responsiveness	Phytohormone responsiveness
AUR62018795-RA.v1.0	CqSRS09	TGACG-motif	cis-acting regulatory element involved in the MeJA-responsiveness	Phytohormone responsiveness
AUR62018795-RA.v1.0	CqSRS09	TGACG-motif	cis-acting regulatory element involved in the MeJA-responsiveness	Phytohormone responsiveness
AUR62018795-RA.v1.0	CqSRS09	TGACG-motif	cis-acting regulatory element involved in the MeJA-responsiveness	Phytohormone responsiveness
AUR62018795-RA.v1.0	CqSRS09	TGACG-motif	cis-acting regulatory element involved in the MeJA-responsiveness	Phytohormone responsiveness
AUR62034552-RA.v1.0	CqSRS10	TGACG-motif	cis-acting regulatory element involved in the MeJA-responsiveness	Phytohormone responsiveness
AUR62006536-RA.v1.0	CqSRS02	TGA-element	auxin-responsive element	Phytohormone responsiveness
AUR62007206-RA.v1.0	CqSRS03	TGA-element	auxin-responsive element	Phytohormone responsiveness
AUR62007206-RA.v1.0	CqSRS03	TGA-element	auxin-responsive element	Phytohormone responsiveness
AUR62010428-RA.v1.0	CqSRS06	TGA-element	auxin-responsive element	Phytohormone responsiveness
AUR62018795-RA.v1.0	CqSRS09	TGA-element	auxin-responsive element	Phytohormone responsiveness
